# Supplementary material for: Age-associated functional healing of musculoskeletal trauma through regenerative engineering and rehabilitation
Source: Royal Society of Chemistry journal article supplement (doi:10.1039/d4bm00616j), 2024-01-01
Supplement: d4bm00616j1.pdf [file d4bm00616j1.pdf]

## Supplemental Material

### Age-Associated Functional Healing of Musculoskeletal Trauma Through Regenerative Engineering and Rehabilitation

Krista M Habing,<sup>a</sup> Cynthia A Alcazar,<sup>a</sup> Victoria R Duke,<sup>a</sup> Yong How Tan,<sup>a</sup> Nick J Willett,<sup>a,b,c,d</sup>  
Karina H Nakayama<sup>a,c,\*</sup>

<sup>a</sup>Department of Biomedical Engineering, Oregon Health & Science University, Portland, OR, USA

<sup>b</sup>Knight Campus for Accelerating Scientific Impact, University of Oregon, Eugene, OR, USA

<sup>c</sup>Department of Orthopaedics, Oregon Health & Science University, Portland, OR, USA

<sup>d</sup>The Veterans Affairs Portland Health Care System, Portland, OR, USA

#### Corresponding Author:

Karina H Nakayama, Department of Biomedical Engineering, Oregon Health & Science University, 3303 S Bond Avenue, Portland, OR 97239 USA. Email: nakayaka@ohsu.edu

#### Video S1.

Muscle force contraction of an uninjured contralateral TA muscle in a young mouse during in situ muscle physiology.

#### Video S2.

Muscle force contraction of a TA muscle following VML injury and treatment with EM and exercise in a young mouse during in situ muscle physiology.

**Video S3.**

Muscle force contraction of a TA muscle following VML injury in an untreated aged mouse during in situ muscle physiology.

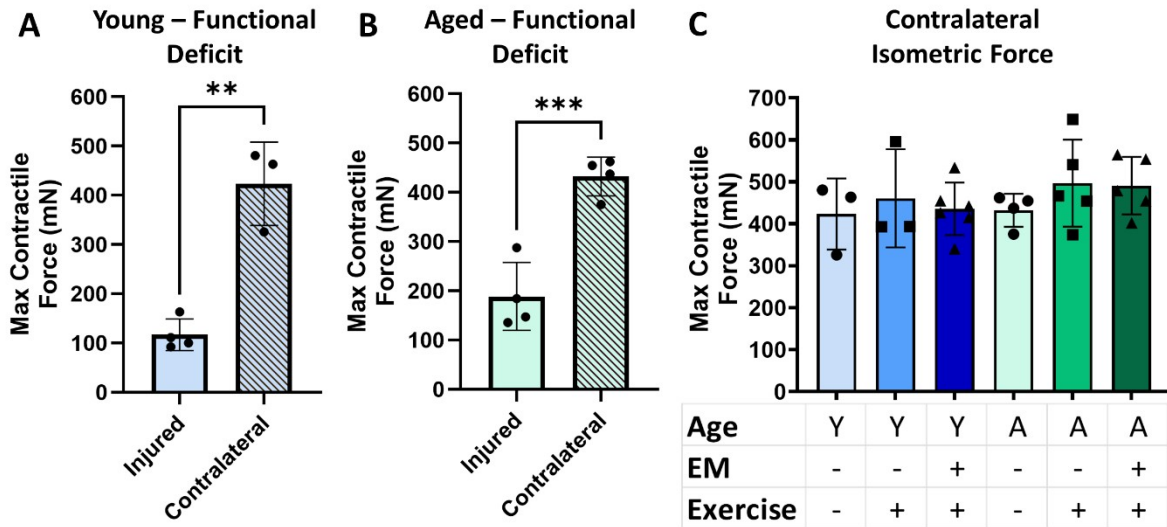

**Supplemental Figure 1. A comparison of muscle function in the contralateral control following VML injury. (A, B)** Maximum contractile force of the injured untreated TA muscle (clear bars) and contralateral TA (patterned bars) in young mice (**A**) and aged mice (**B**) ( $N \geq 3$ ). (**C**) Maximum contractile force of the uninjured contralateral TA muscle in young (blue) and aged (green) mice in the presence (+) and/or absence (-) of EM and exercise ( $N \geq 3$ ). Significance was determined using an unpaired t-test (**A, B**) and a One-Way ANOVA (**C**) with  $p < 0.01$  (\*\*) and  $p < 0.001$  (\*\*\*). Shown are mean  $\pm$  SD.

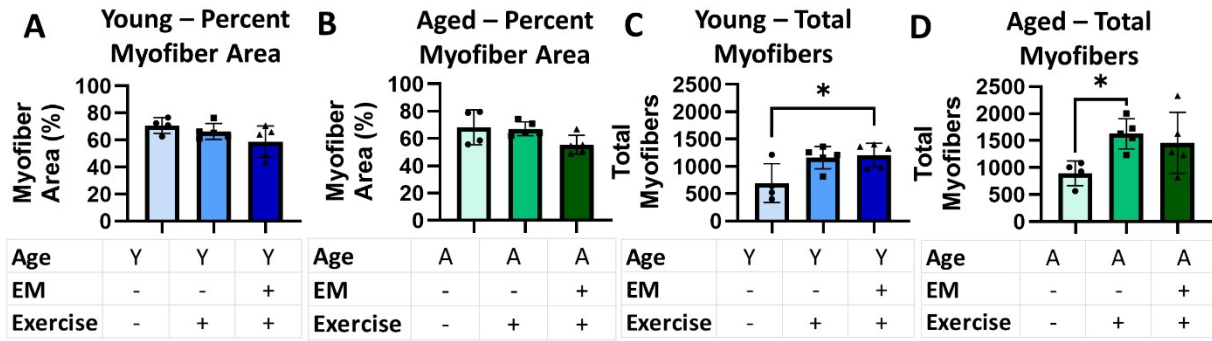

**Supplemental Figure 2. Total myofiber coverage within the defect site. (A,B)** Quantification of the percent area of the defect site (500  $\mu\text{m}$  radius around the EM region or TA injury site) covered by myofibers in the young (**A**) and aged (**B**) groups in the presence (+) and/or absence (-) of EM and exercise ( $N \geq 4$ ). (**C,D**) Quantification of the total myofibers within the defect site (500  $\mu\text{m}$  radius around the EM region or TA injury site) in the young (**C**) and aged (**D**) groups in the presence (+) and/or absence (-) of EM and exercise ( $N \geq 4$ ). Significance was determined using a One-Way ANOVA with  $p < 0.05$  (\*). Shown are mean  $\pm$  SD.
